# Supplementary material for: Crystallographic and spectroscopic evidence for intrinsic distortion in the disordered crystal β-NaGdF4
Source: Royal Society of Chemistry journal article supplement (doi:10.1039/c8cp02041h), 2018-01-01
Supplement: c8cp02041h1.pdf [file c8cp02041h1.pdf]

**Supplementary Information for “Crystallographic and Spectroscopic Evidence for the Intrinsic Distortion in Disordered Crystal:  $\beta$ -NaGdF<sub>4</sub>”**

Jianning Jin, Hua Yu\*, Liying Guo, Jinjin Liu, Bing Wu, Yuao Guo, Yuting Fu, Lijuan Zhao\*\*

Key Laboratory of Weak-Light Nonlinear Photonics, Ministry of Education, School of Physics and Applied Physics Institute, Nankai University, Tianjin 300071, China

\*Corresponding Author: \* [yuhua@nankai.edu.cn](mailto:yuhua@nankai.edu.cn), \*\* [zhaolj@nankai.edu.cn](mailto:zhaolj@nankai.edu.cn)

## Crystal Structure

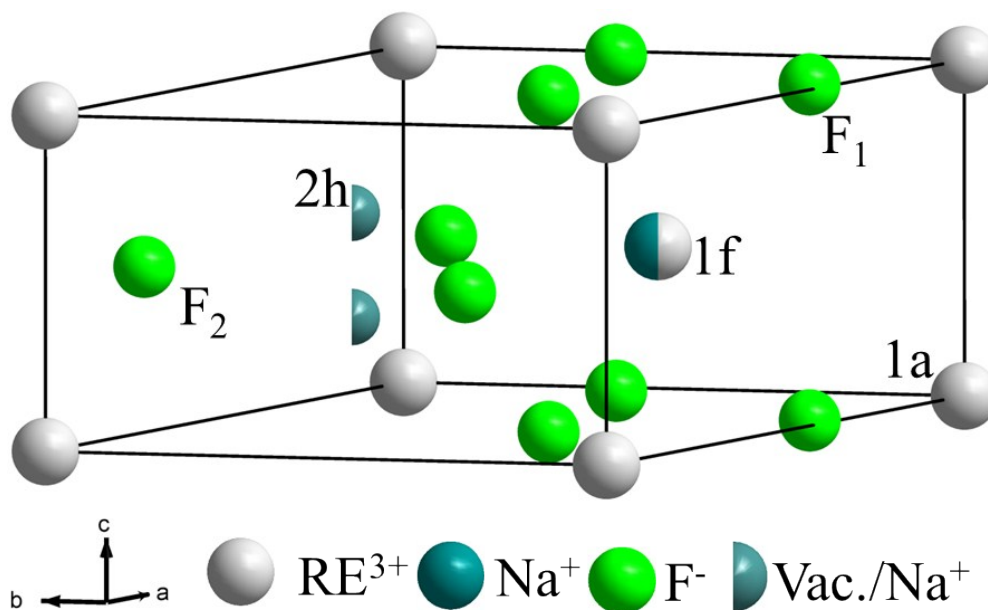

**Figure S1.** Crystal average structure of  $\beta$ -NaREF<sub>4</sub> (SG: *P*-6). The (*1a*) site is occupied by RE<sup>3+</sup> ions, the (*1f*) site is half occupied by RE<sup>3+</sup> ions and half by Na<sup>+</sup> ions, whereas the (*3j*) and (*3k*) sites are occupied by two types of fluorine ions denoted F<sub>1</sub> and F<sub>2</sub>, respectively<sup>[1]</sup>.

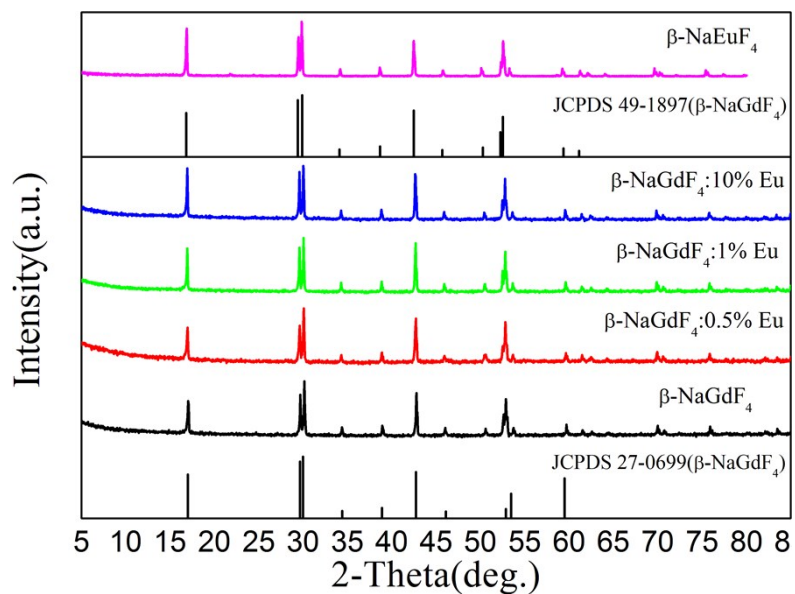

**Figure S2.** XRD patterns of  $\beta$ -NaGdF<sub>4</sub>,  $\beta$ -NaGdF<sub>4</sub>:0.5%Eu,  $\beta$ -NaGdF<sub>4</sub>:1%Eu,  $\beta$ -NaGdF<sub>4</sub>:10%Eu, and  $\beta$ -NaEuF<sub>4</sub> samples.

## First-principles simulations

All calculations were performed using the DMol<sup>3</sup> package of Materials Studio 7.0<sup>[2]</sup>, which is based on the density functional theory (DFT) methods. The Local Density Approximation (LDA) with the Perdew and Wang (PWC) exchange-correlation function in DFT<sup>[3,4]</sup>, and the basis set using double numerical plus d-functions (DND) atomic orbitals version 3.5 were employed<sup>[5]</sup>. The real-space global orbital cutoff radius was chosen to be 5.8 Å. The Brillouin-zone was sampled into 3×3×2 *k*-point. The energy tolerance accuracy, maximum force, and displacement were set as 10<sup>-5</sup> Ha, 2×10<sup>-3</sup> Ha/Å, and 5×10<sup>-3</sup> Å, respectively.

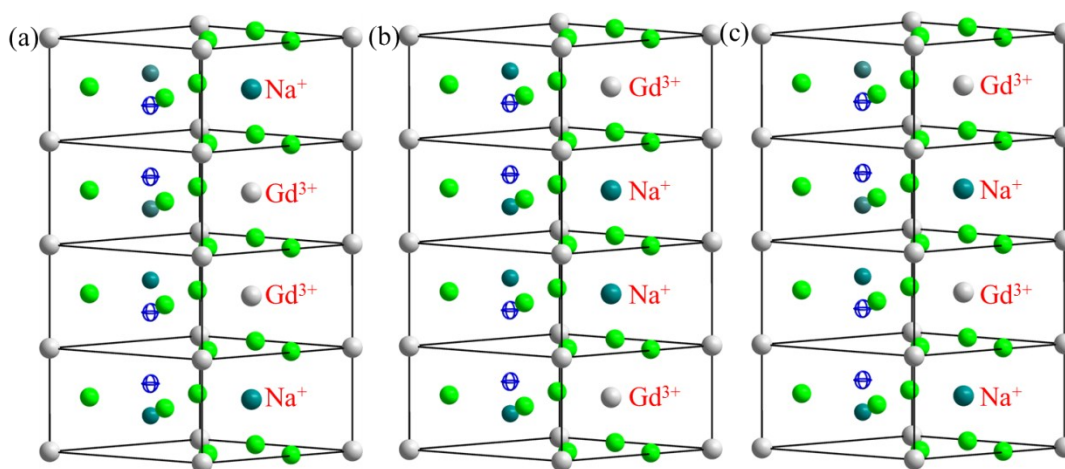

**Figure S3.** 3 type different arrangement of Gd<sup>3+</sup> and Na<sup>+</sup> ions at 1f site in  $\beta$ -NaGdF<sub>4</sub> along c axis super cell model.

**Comments for Figure S3:** In order to research the arrangement of Gd<sup>3+</sup> and Na<sup>+</sup> ions at 1f site in  $\beta$ -NaGdF<sub>4</sub> along c axis, the binding energy of 3 kinds (shown in Figure S3) of  $\beta$ -NaGdF<sub>4</sub> super cell model were calculated. The binding energy is -3257.90243 eV, -3257.34877 eV and -

3259.09539 eV, respectively, for 3 different kinds of structure model. Comparing the results of binding energy, the super cell model, in which  $\text{Gd}^{3+}$  and  $\text{Na}^+$  ions arrangement at *If* site alternate with a translation distance  $c' = 2c$ , has the lowest binding energy. The result illustrate that the situation of (c) is most likely to be in the real case.

### Photoluminescence (PL) spectra of $\beta$ -NaGdF<sub>4</sub>:Eu<sup>3+</sup>

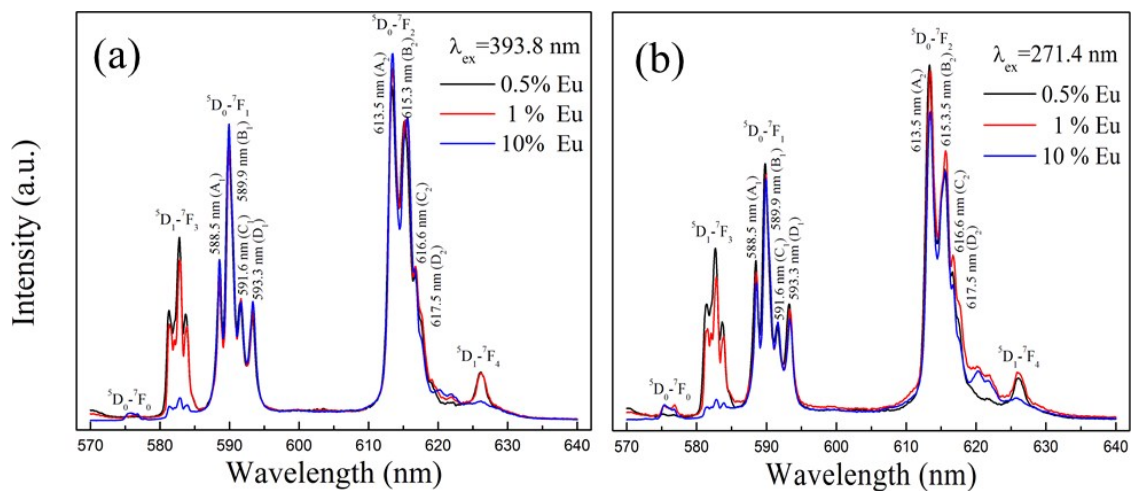

**Figure S4.** Emission spectra of  $\beta$ -NaGd<sub>1-x</sub>F<sub>4</sub>:xEu (x=0.005, 0.01, 0.1) samples under direct and indirect excitation at the wavelength  $\lambda_{\text{ex}}=393.8$  nm(a) and 271.4 nm(b).

## EXAFSs

### EXAFS fitting report of $\beta$ -NaGdF<sub>4</sub>

Reduced Chi-square = 422

R-factor = 0.0025

Guess parameters +/- uncertainties (initial guess):

amp = 0.99 +/- 0.098 (1.0000)

enot\_f = 4.80 +/- 0.87 (0.0000)

ss\_1 = 0.0069 +/- 0.0015 (0.0030)

ss\_3 = 0.0056 +/- 0.0040 (0.0030)

enot\_g = -6.23 +/- 6.09 (0.0000)

enot\_n = 16.00 +/- 0.18 (0.0000)

ss\_4 = 0.00091 +/- 0.0059 (0.0030)

alph\_1 = 0.00092 +/- 0.0041 (0.0100)

alph\_2 = -0.014 +/- 0.013 (0.0100)

alph\_3 = -0.014 +/- 0.0088 (0.0100)

alph\_4 = 0.051 +/- 0.10 (0.0100)

Def parameters (using "FEFF0: Path 1: [F1\_1]"):

ss\_2 = 0.0069

Correlations between variables:

ss\_4 and alph\_4 --> 0.8802

amp and ss\_1 --> 0.8325

enot\_g and alph\_3 --> 0.8149

enot\_f and alph\_1 --> 0.6758

ss\_3 and ss\_4 --> -0.5811

ss\_3 and alph\_4 --> -0.5127

enot\_f and alph\_2 --> 0.4960

enot\_g and ss\_4 --> 0.4330

ss\_3 and alph\_3 --> 0.4003

enot\_f and enot\_n --> 0.3488

enot\_g and alph\_4 --> 0.3187

All other correlations are below 0.25



## EXAFS fitting result and report of $\beta$ -NaEuF<sub>4</sub>

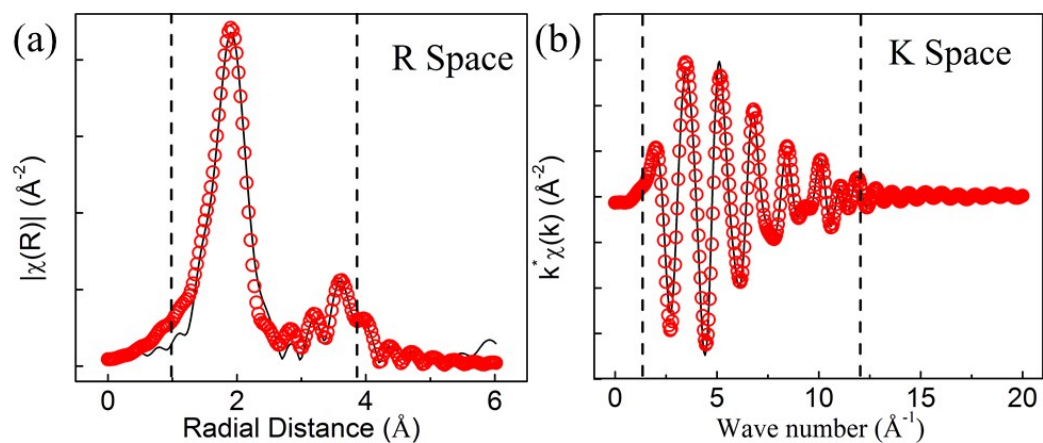

**Figure S5.** Fit of the theoretical (a)  $\chi(R)$  and (b)  $\chi(k)$  (points) in R and K space<sup>[6]</sup>, respectively, to the Eu L<sub>III</sub> edge data of  $\beta$ -NaEuF<sub>4</sub> (solid line) at 300 K. The range over which the fit has been made is shown by the dash line.

**Table S1.** The bond length (Å) of simulation value of Eu L<sub>III</sub> and Gd L<sub>III</sub> edge in pure  $\beta$ -NaEuF<sub>4</sub> and  $\beta$ -NaGdF<sub>4</sub>.

| Cation Site | Bond                               | Experimental radial distance of $\beta$ -NaEuF <sub>4</sub> (Å) | Experimental radial distance of $\beta$ -NaGdF <sub>4</sub> (Å) |
|-------------|------------------------------------|-----------------------------------------------------------------|-----------------------------------------------------------------|
| 1f          | RE <sub>1f</sub> -F <sub>2</sub>   | 2.3236                                                          | 2.3277                                                          |
|             | RE <sub>1f</sub> -F <sub>1</sub>   | 2.4098                                                          | 2.4138                                                          |
|             | RE <sub>1f</sub> -Na <sub>1f</sub> | 3.6107                                                          | 3.7845                                                          |
|             | RE <sub>1f</sub> -Gd <sub>1a</sub> | 3.9242                                                          | 3.8614                                                          |
| 1a          | RE <sub>1a</sub> -F <sub>1</sub>   | 2.3359                                                          | 2.3322                                                          |
|             | RE <sub>1a</sub> -F <sub>2</sub>   | 2.3734                                                          | 2.3694                                                          |
|             | RE <sub>1a</sub> -Gd <sub>1a</sub> | 3.6107                                                          | 3.6043                                                          |
|             | RE <sub>1a</sub> -Gd <sub>1f</sub> | 3.9242                                                          | 3.8614                                                          |
|             | RE <sub>1a</sub> -Na <sub>1f</sub> | 3.9399                                                          | 3.9672                                                          |

**Comments for Figure S6 and Table S1:** The EXAFSs testing and fitting on  $\beta$ -NaEuF<sub>4</sub> sample, which belongs to the same family of compounds as  $\beta$ -NaGdF<sub>4</sub>, also was carried out. The experiment and fitting result of shown in Figure S6 and Table S1. In the fitting process the same structural model as  $\beta$ -NaGdF<sub>4</sub> was used. And according to the result listed in Table S1, the trend of bond length is similar to ones in  $\beta$ -NaGdF<sub>4</sub> crystal. This can illustrate that  $\beta$ -NaEuF<sub>4</sub> and  $\beta$ -NaGdF<sub>4</sub> have the same crystal structure.

## EXAFS fitting report of $\beta$ -NaEuF<sub>4</sub>

Reduced Chi-square = 3900

R-factor = 0.000250

Guess parameters +/- uncertainties (initial guess):

amp = 1.00 +/- 0.100 (1.0000)

enot\_e = 1.12 +/- 4.51 (0.0000)

ss\_1 = 0.0075 +/- 0.0011 (0.0030)

enot\_n = 14.49 +/- 0.40 (0.0000)

enot\_f = 5.02 +/- 0.99 (0.0000)

ss\_3 = 0.0071 +/- 0.0034 (0.0030)

ss\_4 = 0.0011 +/- 0.0026 (0.0030)

alpha\_1 = -0.0039 +/- 0.0039 (0.0100)

alpha\_2 = -0.022 +/- 0.011 (0.0100)

alpha\_3 = -0.0040 +/- 0.0075 (0.0100)

Def parameters (using "FEFF0: Path 1: [F1\_1]"):

ss\_2 = 0.0075

Correlations between variables:

enot\_e and alpha\_3 --> 0.9337

amp and ss\_1 --> 0.7683

ss\_3 and ss\_4 --> -0.7549

enot\_f and alpha\_1 --> 0.7374

alpha\_2 and alpha\_3 --> 0.4638

amp and enot\_f --> -0.3479

enot\_e and alpha\_2 --> 0.3261

ss\_1 and enot\_f --> -0.3077

alpha\_1 and alpha\_3 --> -0.2716

amp and ss\_4 --> 0.2672

ss\_4 and alpha\_1 --> -0.2641

enot\_f and alpha\_2 --> 0.2613

All other correlations are below 0.25

## Reference

- [1] Burns, J. H. Crystal Structure of Hexagonal Sodium Neodymium Fluoride and Related Compounds. *Inorg. Chem.* **1965**, 4(6), 881-886.
- [2] Delley, B. From Molecules to Solids with the DMol<sup>3</sup> Approach [J]. *J. Chem. Phys.* **2000**, 113(18), 7756-7764.
- [3] Delley, B. An all-electron Numerical Method for Solving the Local Density Functional for Polyatomic Molecules [J]. *J. Chem. Phys.* **1990**, 92(1), 508-517.
- [4] Perdew, J. P., Wang Y. Accurate and Simple Analytic Representation of the Electron-gas Correlation Energy [J]. *Phys. Rev. B: Condens. Matter* **1992**, 45(23), 13244-13249.
- [5] Inada, Y.; Orita H. Efficiency of Numerical Basis Sets for Predicting the Binding Energies of Hydrogen Bonded Complexes: Evidence of Small Basis Set Superposition Error Compared to Gaussian Basis Sets [J]. *J. Comput. Chem.* **2008**, 29, 225-232.
- [6] Ravel, B.; Newville, M. ATHENA, ARTEMIS, HEPHAESTUS: Data Analysis for X-ray Absorption Spectroscopy Using IFEFFIT [J]. *J. Synchrotron Radiat.* **2005**, 12, 537-541.
